# Supplementary material
Source: PubMed Central journal article supplement (PMC4791016)
Supplement: pnas.1513410113.sapp.pdf [file pnas.1513410113.sapp.pdf]

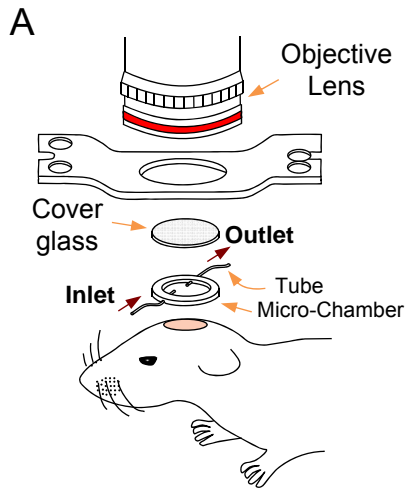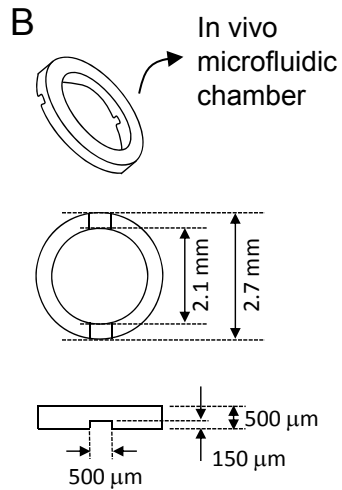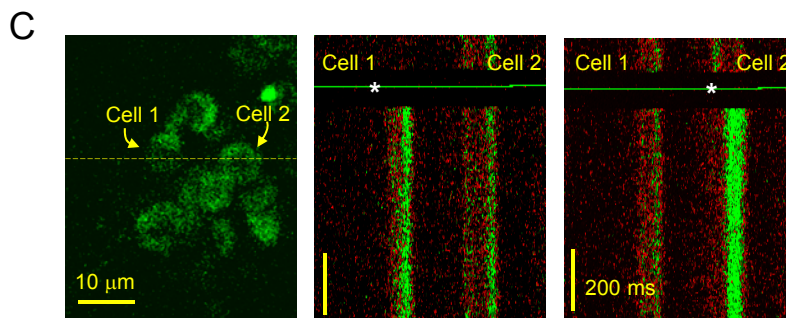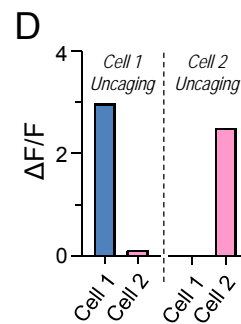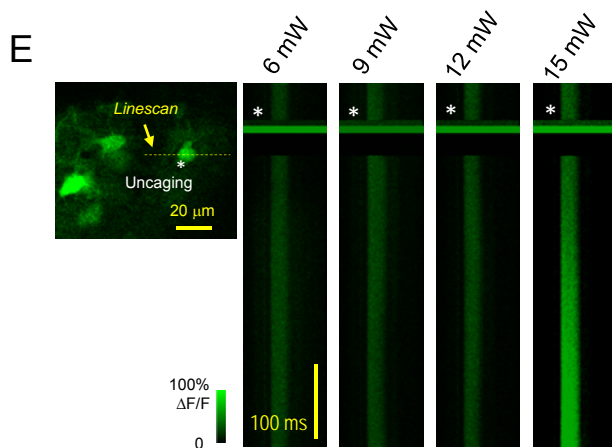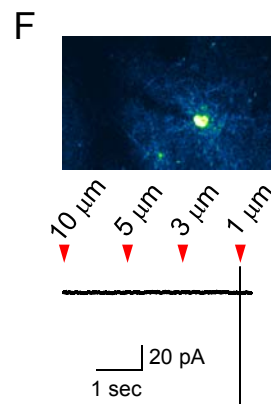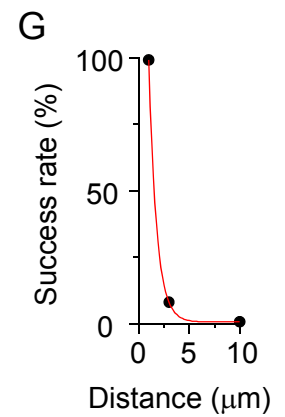

**Fig. S1.** Verification of *in vivo* two-photon photolysis and imaging. (A) Schematic design of *in vivo* imaging and uncaging system. After craniotomy at primary somatosensory cortex, a custom-designed thin, small micro-chamber was implanted. Thin tubes were connected in both sides of chamber, so that caged compounds and pharmacological drugs were perfused through the tubes. A small leak between the micro-chamber and skull was sealed with kwik sil™ (World Precision Instruments, Inc). Coverglass was placed on the top of the micro-chamber to cover the micro-chamber and a head plate was fixed by dental cement. (B) Design of microfluidic chamber. A detail measurement of micro-chamber was shown in the top and side views. (C) Measurement of Ca<sup>2+</sup> transients from two neurons when either neuron was activated separately. Cell 1 and Cell 2 were activated one by one and Ca<sup>2+</sup> response was observed only from a neuron we activated by glutamate uncaging. (D) Bar graph of fluorescence change in neuron 1 and 2 when they were activated by glutamate photolysis. (E) All-or-none fashion of Ca<sup>2+</sup> transients. Uncaging laser power was gradually increased targeting onto the same neuron. (F) Representative recording showing cell firing only when the neuron was activated within 1 μm distance from the cell body. (G) Success rate of distance-dependent AP trigger (n=11).

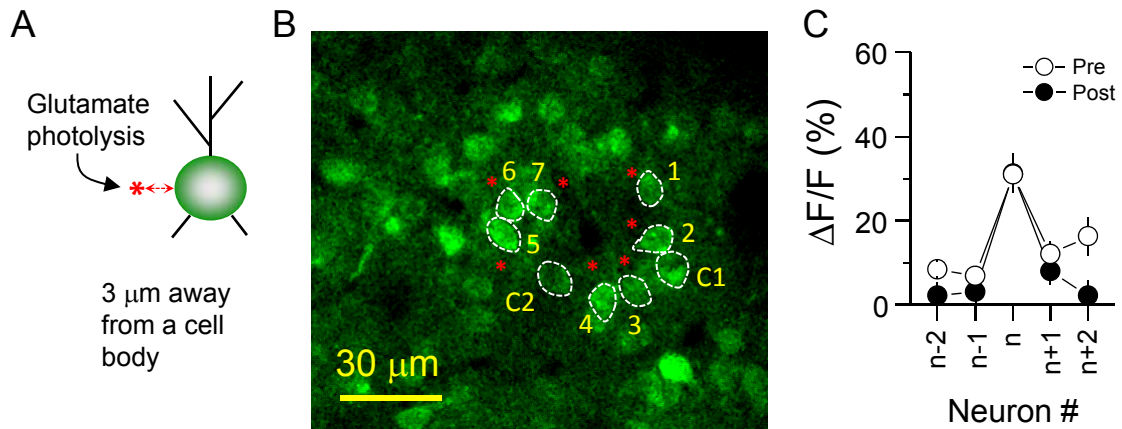

**Fig. S2.** Glutamate spillover does not cause the magnitude of  $\text{Ca}^{2+}$  responses. (A) Schematic diagram of glutamate photolysis. Glutamate was photoreleased 3  $\mu\text{m}$  away from the cell body. (B) The location of uncaging spots is marked as a red asterisk. (3  $\mu\text{m}$  away from the cell body). Glutamate was photoreleased sequentially (from neuron #1 to #7) three times in a same order and then no further uncaging was given for two minutes. These 3 x sequential activations were repeated 15 times for a total of 45 (3x15) sequential activations. (C) Fluorescence change was monitored after photoreleasing glutamate 3  $\mu\text{m}$  away from the cell body. Repetitive spike trains total 45 times did not cause any significant changes in  $\text{Ca}^{2+}$  magnitude in neighboring neurons by spillover.

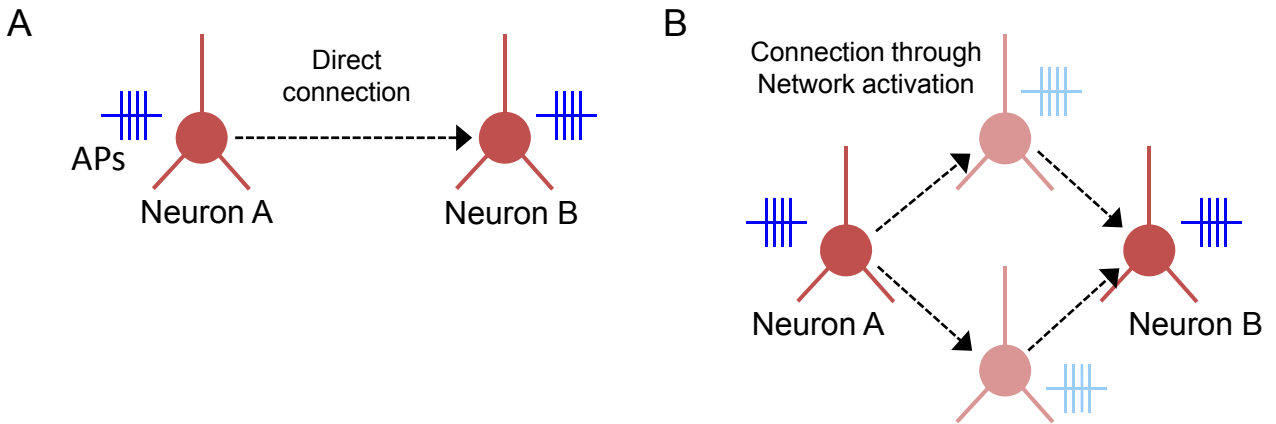

**Fig. S3.** Potential cellular mechanisms of functional circuit reorganization. (A) Circuit reorganization via making direct monosynaptic connection among neurons. In this example, neuron A and B are connected weakly, so APs are not able to be triggered from Neuron B by activating neuron A. When neurons are activated together many times, the direct monosynaptic connection becomes stronger to fire together or new strong connections are made among them. (B) Neurons become functionally connected through indirect network activation although they are not directly connected.

W/O chamber

W/ chamber

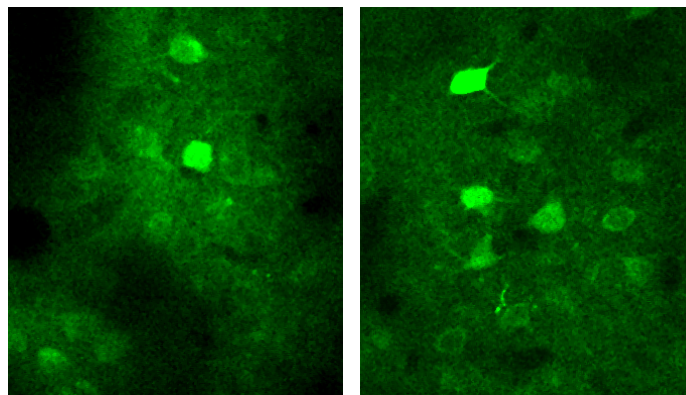

**Fig. S4.** Comparison images with and without *in vivo* micro-chamber. Images were taken in the exactly same conditions under the same microscope. Glass window directly pressed the brain surface when the chamber was not used.

Table 1

## Test

|     | Pre     |      | Post    |      | p-Value      | n   |
|-----|---------|------|---------|------|--------------|-----|
|     | Average | SEM  | Average | SEM  |              |     |
| n-3 | 1.11    | 2.90 | 22.65   | 3.48 | 0.0000309725 | 82  |
| n-2 | 5.38    | 2.64 | 23.73   | 3.72 | 0.0000513298 | 98  |
| n-1 | 4.48    | 2.29 | 25.79   | 3.98 | 0.0000008466 | 114 |
| n   | 39.04   | 7.62 | 35.34   | 6.74 | 0.6319491696 | 130 |
| n+1 | 4.54    | 2.15 | 29.71   | 3.90 | 0.0000000132 | 114 |
| n+2 | 3.37    | 2.04 | 27.47   | 3.03 | 0.0000000043 | 98  |
| n+3 | 4.34    | 1.06 | 23.68   | 2.99 | 0.0000028346 | 82  |

Table 2

## Control

|     | Pre     |      | Post    |      | p-Value     | n  |
|-----|---------|------|---------|------|-------------|----|
|     | Average | SEM  | Average | SEM  |             |    |
| n-2 | 1.80    | 3.14 | 1.57    | 3.01 | 0.957893351 | 29 |
| n-1 | 1.80    | 3.02 | 0.38    | 3.23 | 0.751561911 | 29 |
| n   | 28.38   | 7.09 | 34.48   | 5.29 | 0.49942796  | 29 |
| n+1 | 0.75    | 4.47 | 4.22    | 3.38 | 0.543559891 | 29 |
| n+2 | 1.74    | 3.40 | 7.04    | 2.53 | 0.229147869 | 29 |

Table 3

|     | 1ms      |          |    | 20ms     |          |    | 100ms    |          |    |
|-----|----------|----------|----|----------|----------|----|----------|----------|----|
|     | Average  | SEM      | n  | Average  | SEM      | n  | Average  | SEM      | n  |
| n-2 | 26.73301 | 3.171684 | 25 | 21.30267 | 3.905207 | 10 | 8.164401 | 1.677979 | 10 |
| n-1 | 32.47889 | 2.966215 | 30 | 25.67951 | 3.657282 | 15 | 10.28649 | 0.963994 | 15 |
| n   | 39.69671 | 1.758103 | 35 | 34.84388 | 4.609949 | 20 | 36.12847 | 1.602566 | 20 |
| n+1 | 33.64517 | 4.002061 | 30 | 24.00496 | 3.275077 | 15 | 11.0895  | 2.419325 | 15 |
| n+2 | 26.22248 | 3.431657 | 25 | 21.8628  | 3.723536 | 10 | 11.77161 | 2.452496 | 10 |

Table 4

## 200ms Interval

|     | Pre     |      | Post    |      | p-Value | n  |
|-----|---------|------|---------|------|---------|----|
|     | Average | SEM  | Average | SEM  |         |    |
| n-2 | 9.51    | 7.07 | -1.15   | 3.30 | 0.19    | 10 |
| n-1 | 6.17    | 3.91 | 4.89    | 5.10 | 0.84    | 15 |
| n   | 41.25   | 9.45 | 45.33   | 8.36 | 0.74    | 20 |
| n+1 | -2.78   | 4.05 | 1.77    | 3.89 | 0.42    | 15 |
| n+2 | -3.44   | 3.57 | 8.63    | 4.79 | 0.05    | 10 |

**Table 5 CPP**

|     | Pre     |      | Post    |      | p-Value | n  |
|-----|---------|------|---------|------|---------|----|
|     | Average | SEM  | Average | SEM  |         |    |
| n-2 | -2.79   | 3.75 | 0.47    | 4.67 | 0.59    | 10 |
| n-1 | 0.45    | 3.55 | 0.84    | 3.10 | 0.93    | 15 |
| n   | 32.77   | 6.60 | 36.58   | 6.97 | 0.69    | 20 |
| n+1 | 6.27    | 2.61 | -0.34   | 2.24 | 0.06    | 15 |
| n+2 | 9.26    | 3.29 | 5.11    | 3.90 | 0.42    | 10 |

**Table 6**

|     | KN-62    |          |    | KN-93    |          |    | KN-92    |          |    |
|-----|----------|----------|----|----------|----------|----|----------|----------|----|
|     | Average  | SEM      | n  | Average  | SEM      | n  | Average  | SEM      | n  |
| n-2 | 3.987902 | 2.876836 | 10 | 7.560611 | 1.293438 | 15 | 25.19503 | 6.196556 | 10 |
| n-1 | 7.788826 | 1.330061 | 15 | 5.594001 | 1.223317 | 20 | 28.20104 | 5.775818 | 15 |
| n   | 31.99761 | 1.36506  | 20 | 30.49602 | 0.789613 | 25 | 31.04638 | 4.875743 | 20 |
| n+1 | 6.012459 | 2.730284 | 15 | 5.916957 | 1.379058 | 20 | 28.54631 | 6.783979 | 15 |
| n+2 | 4.938112 | 2.718362 | 10 | 6.367751 | 1.352577 | 15 | 25.19794 | 6.767128 | 10 |

**Table 7 3 cells**

|     | Pre     |      | Post    |      | p-Value | n  |
|-----|---------|------|---------|------|---------|----|
|     | Average | SEM  | Average | SEM  |         |    |
| n-2 | -3.65   | 5.48 | 2.26    | 1.88 | 0.35    | 5  |
| n-1 | 2.91    | 2.42 | 7.97    | 2.26 | 0.14    | 10 |
| n   | 25.03   | 3.99 | 24.56   | 6.63 | 0.95    | 15 |
| n+1 | 1.84    | 2.40 | 8.91    | 2.23 | 0.05    | 10 |
| n+2 | 3.49    | 2.75 | -4.98   | 3.04 | 0.07    | 5  |

**Table 8 Gabazine**

|     | Pre     |      | Post    |      | p-Value     | n  |
|-----|---------|------|---------|------|-------------|----|
|     | Average | SEM  | Average | SEM  |             |    |
| n-2 | 6.01    | 1.85 | 25.96   | 3.21 | 0.000087240 | 10 |
| n-1 | 5.59    | 0.98 | 28.71   | 3.09 | 0.000001844 | 15 |
| n   | 28.51   | 4.46 | 30.76   | 4.66 | 0.728605333 | 20 |
| n+1 | 5.33    | 2.13 | 28.44   | 3.92 | 0.000036348 | 15 |
| n+2 | 5.42    | 3.68 | 24.78   | 4.39 | 0.003446303 | 10 |

**Table 9 Muscimol**

|     | Pre     |      | Post    |      | p-Value | n  |
|-----|---------|------|---------|------|---------|----|
|     | Average | SEM  | Average | SEM  |         |    |
| n-2 | 2.04    | 1.33 | 3.22    | 1.45 | 0.55393 | 14 |
| n-1 | 3.77    | 1.08 | 5.98    | 1.73 | 0.28668 | 19 |
| n   | 26.77   | 2.34 | 27.91   | 2.34 | 0.7327  | 24 |
| n+1 | 4.74    | 1.84 | 3.83    | 1.22 | 0.6823  | 19 |
| n+2 | 5.08    | 0.98 | 2.85    | 1.88 | 0.30519 | 14 |

Average and SEM in all supplementary tables represent  $\Delta F/F$  (%)
